# Supplementary material for: Wrinkling on Stimuli-Responsive Functional Polymer Surfaces as a Promising Strategy for the Preparation of Effective Antibacterial/Antibiofouling Surfaces
Source: MDPI journal article supplement (doi:10.3390/polym13234262), 2021-12-06
Supplement: s1 [file s1]

Supplementary Material.

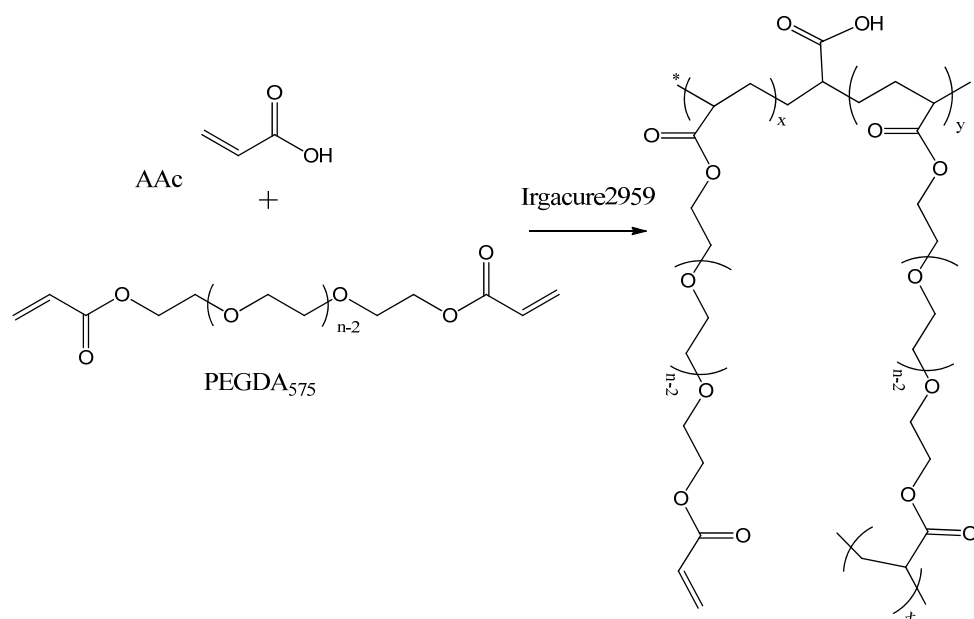

**Figure S1.** Schematic representation of the proposed chemical structure of *net-poly*(AAc-co-PEGDA<sub>575</sub>).

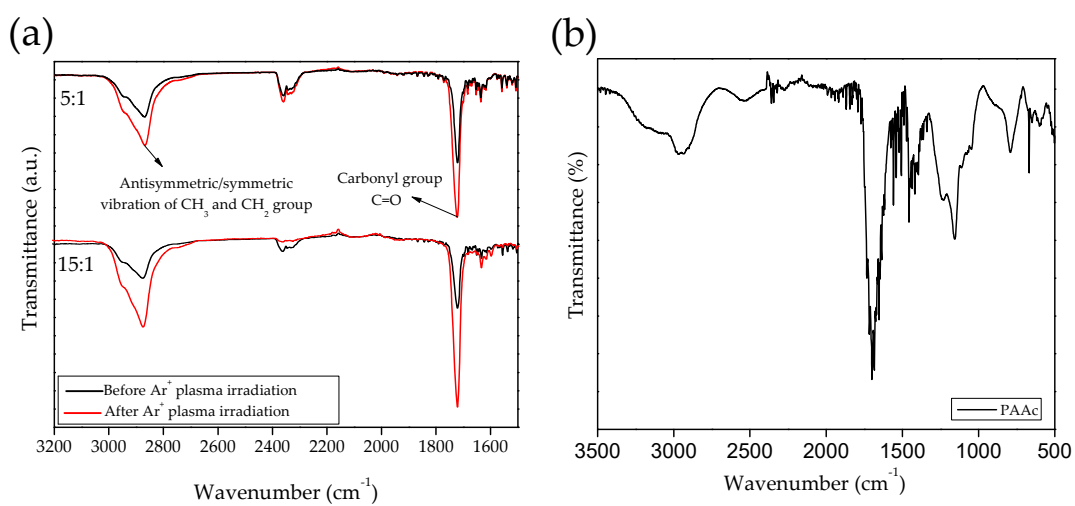

**Figure S2.** ATR-FTIR spectra of a) *net-poly*(AAc-co-PEGDA<sub>575</sub>) with a mole ratio of 5:1 and 15:1 before and after argon plasma irradiation and b) polyAAc (PAAc).

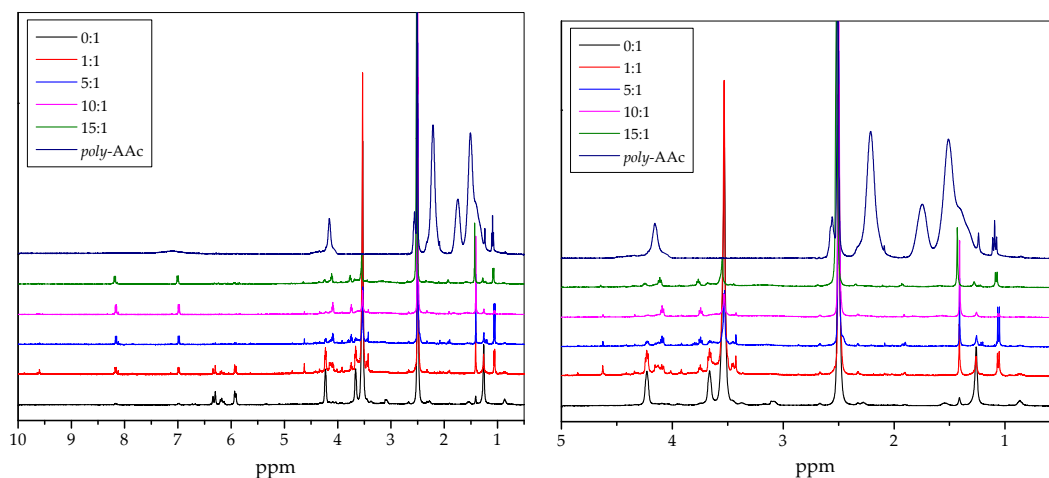

**Figure S3.**  $^1\text{H}$ -NMR spectra of *net-poly*(AAc-co-PEGDA<sub>575</sub>) at different mole ratio from 0:1 to 15:1 and *poly-AAc*.

#### Description of signals identified by nuclear magnetic resonance (NMR)

*net-poly*(AAc-co-PEGDA<sub>575</sub>) at 0:1 mole ratio.

$^1\text{H}$ -NMR (DMSO- $d_6$ ): 6.34 and 6.30 (*trans*  $\text{CH}_2=\text{CH}-\text{C}(\text{O})-\text{OR}$ , **1.46H**, d); 6.21 and 6.16 ( $\text{CH}_2=\text{CH}-\text{C}(\text{O})-\text{OR}$ , **1.0H**, t); 5.93 and 5.91 (*cis*  $\text{CH}_2=\text{CH}-\text{C}(\text{O})-\text{OR}$ , **1.57H**, d); 4.24-4.22 ( $\text{CH}_2=\text{CH}-\text{C}(\text{O})-\text{O}-\text{CH}_2-$ , **3.92H**, s); 3.66 ( $-\text{CH}_2-\text{CH}-\text{C}(\text{O})-\text{O}-\text{CH}_2-\text{CH}_2-$ , **4.38H**, t); 3.53( $-(\text{CH}_2-\text{CH}_2-\text{O})_8-$ , **25.42H**, s); 2.67 ( $-\text{CH}_2-\text{CH}(\text{R})_n-$ , **0.28H**, s); 2.33 ( $-\text{CH}(\text{R})-\text{CH}_2-\text{CH}_2\text{C}(\text{O})-\text{OR}-$ , **0.79H**, t); 1.90 ( $-(\text{CH}_2-\text{CH}(\text{R})_n-$ , **0.17H**, s); 1.41 ( $-(\text{CH}_2-\text{CH}(\text{R})_n-\text{CH}_2-$ , **0.63H**, s); 1.26 ( $-(\text{CH}_2-\text{CH}(\text{R}))_{xy}\text{CH}_3^*$ , **5.70H**, d).

*net-poly*(AAc-co-PEGDA<sub>575</sub>) at 1:1 mole ratio.

$^1\text{H}$ -NMR (DMSO- $d_6$ ): 9.60 ( $\text{CH}_2=\text{CH}-\text{COOH}$ , **1.32H**, s); 6.34 and 6.30 (*trans*  $\text{CH}_2=\text{CH}-\text{C}(\text{O})-\text{OR}$ , **3.69H**, d); 6.21 and 6.16 ( $\text{CH}_2=\text{CH}-\text{C}(\text{O})-\text{OR}$ , **1.0H**, t); 6.11 and 6.04 ( $\text{CH}_2=\text{CH}-\text{C}(\text{O})-\text{OH}$ , **0.09H**, s); 5.94 and 5.91 (*cis*  $\text{CH}_2=\text{CH}-\text{C}(\text{O})-\text{OR}$ , **4.48H**, d); 4.24-4.22 ( $\text{CH}_2=\text{CH}-\text{C}(\text{O})-\text{O}-\text{CH}_2-$ , **14.74H**, t); 4.10-4.08 ( $-(\text{CH}(\text{COOH})-\text{CH}_2)_n-$ , **6.91H**, m); 3.76-3.73 ( $-\text{CH}_2-\text{CH}(\text{COOH})-\text{CH}_2-$ , **5.82H**, t); 3.68-3.63( $-\text{CH}_2-\text{CH}_2-$

C(O)-O-CH<sub>2</sub>-, **16.18H, m**); 3.53 (-(CH<sub>2</sub>-CH<sub>2</sub>-O)<sub>8</sub>-, **126.58H, s**); 2.67 (-CH<sub>2</sub>-CH(R)<sub>n</sub>-, **1.68H, s**); 2.33 (-CH(R)-CH<sub>2</sub>-CH<sub>2</sub>C(O)-OR-, **2.20H, s**); 1.90 (-CH<sub>2</sub>-CH(R)<sub>n</sub>-, **1.56H, s**); 1.41 (-(CH<sub>2</sub>-CH(R)<sub>n</sub>-CH<sub>2</sub>-), **11.62H, s**); 1.26 (-(CH<sub>2</sub>-CH(R))<sub>x,y</sub>CH<sub>3</sub>\*, **9.89H, d**) and 1.07-1.05 (-(CH(COOH)-CH<sub>3</sub>\*)<sub>n</sub>-, **9.40H, d**).

*net-poly*(AAc-co-PEGDA<sub>575</sub>) at 5:1 mole ratio.

<sup>1</sup>H-NMR (DMSO-d<sub>6</sub>): 9.60 (CH<sub>2</sub>=CH-COOH, **1.55H, s**); 6.34 and 6.30 (*trans* CH<sub>2</sub>=CH-C(O)-OR, **2.71H, d**); 6.21 and 6.16 (CH<sub>2</sub>=CH-C(O)-OR, **1.0H, t**); 6.11 and 6.04 (CH<sub>2</sub>=CH-C(O)-OH, **2.38H, s**); 5.94 and 5.91 (*cis* CH<sub>2</sub>=CH-C(O)-OR, **3.89H, d**); 4.24-4.22 (CH<sub>2</sub>=CH-C(O)-O-CH<sub>2</sub>-, **17.40H, t**); 4.10-4.08 ((-CH(COOH)-CH<sub>2</sub>)<sub>n</sub>-, **24.82H, m**); 3.76-3.73 (-CH<sub>2</sub>-CH(COOH)-CH<sub>2</sub>-, **19.22H, t**); 3.68-3.63(-CH<sub>2</sub>-CH<sub>2</sub>-C(O)-O-CH<sub>2</sub>-, **20.0H, m**); 3.53 (-(CH<sub>2</sub>-CH<sub>2</sub>-O)<sub>8</sub>-, **122.01H, s**); 2.67 (-CH<sub>2</sub>-CH(R)<sub>n</sub>-, **6.35H, s**); 2.33 (-CH(R)-CH<sub>2</sub>-CH<sub>2</sub>C(O)-OR-, **6.41H, s**); 1.90 (-CH<sub>2</sub>-CH(R)<sub>n</sub>-, **12.69H, s**); 1.41 (-(CH<sub>2</sub>-CH(R)<sub>n</sub>-CH<sub>2</sub>-), **48.44H, s**); 1.26 (-(CH<sub>2</sub>-CH(R))<sub>x,y</sub>CH<sub>3</sub>\*, **23.0H, d**) and 1.07-1.05 (-(CH(COOH)-CH<sub>3</sub>\*)<sub>n</sub>-, **40.77H, d**).

*net-poly*(AAc-co-PEGDA<sub>575</sub>) at 10:1 mole ratio.

<sup>1</sup>H-NMR (DMSO-d<sub>6</sub>): 9.60 (CH<sub>2</sub>=CH-COOH, **8.69H, s**); 6.34 and 6.30 (*trans* CH<sub>2</sub>=CH-C(O)-OR, **1.28H, d**); 6.26 (*trans* (CH<sub>2</sub>=CH-C(O)-OH, **0.61H, d**); 6.21 and 6.14 (CH<sub>2</sub>=CH-C(O)-OR, **1.0H, t**); 6.11 and 6.04 (CH<sub>2</sub>=CH-C(O)-OH, **0.41H, s**); 5.94 and 5.91 (*cis* CH<sub>2</sub>=CH-C(O)-OR, **3.11H, d**); 5.83-5.85 (CH<sub>2</sub>=CH-C(O)-OH, **1.69H, d**); 4.24-4.22 (CH<sub>2</sub>=CH-C(O)-O-CH<sub>2</sub>-, **48.57H, t**); 4.10-4.08 ((-CH(COOH)-CH<sub>2</sub>)<sub>n</sub>-, **127.97H, m**); 3.76-3.73 (-CH<sub>2</sub>-CH(COOH)-CH<sub>2</sub>-, **114.59H, t**); 3.68-3.63(-CH<sub>2</sub>-CH<sub>2</sub>-C(O)-O-CH<sub>2</sub>-, **12.00H, m**); 3.53 (-(CH<sub>2</sub>-CH<sub>2</sub>-O)<sub>8</sub>-, **331.79H, s**); 2.67 (-CH<sub>2</sub>-CH(R)<sub>n</sub>-, **27.35H, s**); 2.33 (-CH(R)-CH<sub>2</sub>-CH<sub>2</sub>C(O)-OR-, **42.97H, s**); 1.90 (-CH<sub>2</sub>-CH(R)<sub>n</sub>-, **16.28H, s**); 1.41 (-(CH<sub>2</sub>-CH(R)<sub>n</sub>-CH<sub>2</sub>-), **343.56H, s**); 1.26 (-(CH<sub>2</sub>-CH(R))<sub>x,y</sub>CH<sub>3</sub>\*, **67.70H, d**) and 1.07-1.05 (-(CH(COOH)-CH<sub>3</sub>\*)<sub>n</sub>-, **31.49H, d**).

*net-poly*(AAc-co-PEGDA<sub>575</sub>) at 15:1 mole ratio.

<sup>1</sup>H-NMR (DMSO-d<sub>6</sub>): 9.60 (CH<sub>2</sub>=CH-COOH, **1.17H**, s); 6.34 and 6.30 (*trans* CH<sub>2</sub>=CH-C(O)-OR, **1.16H**, d); 6.26 (*trans* (CH<sub>2</sub>=CH-C(O)-OH, **0.56H**, d); 6.21 and 6.14 (CH<sub>2</sub>=CH-C(O)-OR, **1.0H**, t); 6.11 and 6.04 (CH<sub>2</sub>=CH-C(O)-OH, **0.87H**, s); 5.94 and 5.91 (*cis* CH<sub>2</sub>=CH-C(O)-OR, **1.61H**, d); 5.83-5.85 (CH<sub>2</sub>=CH-C(O)-OH, **1.02H**, d); 4.24-4.22 (CH<sub>2</sub>=CH-C(O)-O-CH<sub>2</sub>-, **7.88H**, t); 4.10-4.08 ((-CH(COOH)-CH<sub>2</sub>)<sub>n</sub>-, **14.35H**, m); 3.76-3.73 (-CH<sub>2</sub>-CH(COOH)-CH<sub>2</sub>-, **11.87H**, t); 3.68-3.63 (-CH<sub>2</sub>-CH<sub>2</sub>-C(O)-O-CH<sub>2</sub>-, **8.33H**, m); 3.53 (-CH<sub>2</sub>-CH<sub>2</sub>-O)<sub>8</sub>-, **39.87H**, s); 2.67 (-CH<sub>2</sub>-CH(R)<sub>n</sub>-, **3.80H**, s); 2.33 (-CH(R)-CH<sub>2</sub>-CH<sub>2</sub>-C(O)-OR-, **5.08H**, s); 1.90 (-CH<sub>2</sub>-CH(R)<sub>n</sub>-, **6.58H**, s); 1.41 (-CH<sub>2</sub>-CH(R)<sub>n</sub>-CH<sub>2</sub>-, **37.66H**, s); 1.26 (-CH<sub>2</sub>-CH(R))<sub>x,y</sub>CH<sub>3</sub>\*, **9.59H**, d) and 1.07-1.05 (-CH(COOH)-CH<sub>3</sub>\*)<sub>n</sub>-, **17.83H**, d).

*Poly*(AAc)

<sup>1</sup>H-NMR (DMSO-d<sub>6</sub>): <sup>1</sup>H-NMR (DMSO-D<sub>6</sub>): 7.09 (CH-CH-COOH, **3H**, s); 2.58-2.56 (-CH(COOH)-CH<sub>2</sub>)<sub>n</sub>, **40H**, t); 2.21-1.24 (-CH(COOH)-CH<sub>2</sub>)<sub>n</sub>, **80H**, m) and 1.11-1.08 (-CH(COOH)-CH<sub>3</sub>\*)<sub>n</sub>, **3H**, t).

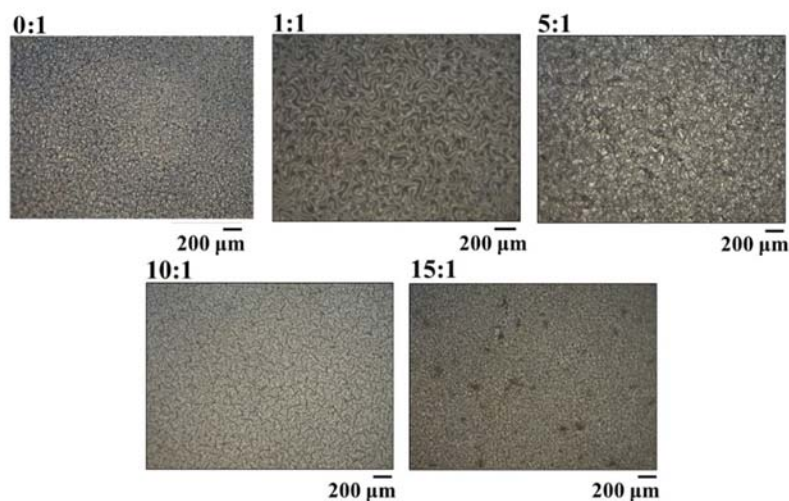

**Figure S4.** Optical microscopy images of the samples AAc:PEGDA<sub>575</sub> at different mole ratios.
